# Supplementary material for: High GC content causes orphan proteins to be intrinsically disordered
Source: PubMed Central journal article supplement (PMC5389847; doi:10.1371/journal.pcbi.1005375), 2017-03-29
Supplement: pcbi.1005375.s001.pdf [file pcbi.1005375.s001.pdf]

| Tax ID  | Tax Name                                           | Orphans     | Genus Orphans | Intermediate  | Ancient        |
|---------|----------------------------------------------------|-------------|---------------|---------------|----------------|
| 936046  | Agaricus bisporus var. bisporus h97                | 23 (0.24)%  | 0 (0.0%)      | 1075 (11.05%) | 8633 (88.72%)  |
| 597362  | Agaricus bisporus var. burnettii jb137-s8          | 40 (0.56)%  | 0 (0.0%)      | 832 (11.6%)   | 6299 (87.84%)  |
| 447093  | Ajellomyces capsulatus g186ar                      | 35 (0.41)%  | 27 (0.32%)    | 1245 (14.73%) | 7148 (84.54%)  |
| 544712  | Ajellomyces capsulatus h143                        | 17 (0.19)%  | 343 (3.8%)    | 1311 (14.52%) | 7359 (81.5%)   |
| 544711  | Ajellomyces capsulatus h88                         | 29 (0.32)%  | 343 (3.79%)   | 1360 (15.01%) | 7329 (80.89%)  |
| 339724  | Ajellomyces capsulatus nam1                        | 71 (0.83)%  | 27 (0.32%)    | 583 (6.85%)   | 7829 (92.0%)   |
| 653446  | Ajellomyces dermatitidis atcc 18188                | 22 (0.24)%  | 172 (1.85%)   | 1430 (15.38%) | 7674 (82.53%)  |
| 559297  | Ajellomyces dermatitidis er-3                      | 12 (0.13)%  | 172 (1.85%)   | 1357 (14.59%) | 7762 (83.44%)  |
| 559298  | Ajellomyces dermatitidis sh14081                   | 15 (0.16)%  | 0 (0.0%)      | 1549 (16.72%) | 7699 (83.12%)  |
| 7167    | Anopheles albimanus                                | 0 (0.0%)    | 0 (0.0%)      | 1867 (17.54%) | 8775 (82.46%)  |
| 7173    | Anopheles arabiensis                               | 0 (0.0%)    | 13 (0.11%)    | 2389 (19.77%) | 9679 (80.12%)  |
| 41427   | Anopheles atroparvus                               | 0 (0.0%)    | 0 (0.0%)      | 2895 (22.8%)  | 9802 (77.2%)   |
| 43041   | Anopheles christyi                                 | 0 (0.0%)    | 44 (0.43%)    | 1737 (16.92%) | 8486 (82.65%)  |
| 139723  | Anopheles culicifacies                             | 0 (0.0%)    | 0 (0.0%)      | 3032 (22.59%) | 10391 (77.41%) |
| 43151   | Anopheles darlingi                                 | 35 (0.35)%  | 0 (0.0%)      | 1362 (13.45%) | 8733 (86.21%)  |
| 7168    | Anopheles dirus                                    | 0 (0.0%)    | 0 (0.0%)      | 2109 (18.09%) | 9548 (81.91%)  |
| 199890  | Anopheles epiroticus                               | 0 (0.0%)    | 0 (0.0%)      | 2065 (17.76%) | 9561 (82.24%)  |
| 69004   | Anopheles farauti                                  | 0 (0.0%)    | 0 (0.0%)      | 2800 (22.66%) | 9555 (77.34%)  |
| 62324   | Anopheles funestus                                 | 0 (0.0%)    | 0 (0.0%)      | 2197 (18.51%) | 9674 (81.49%)  |
| 7165    | Anopheles gambiae                                  | 73 (0.59)%  | 26 (0.21%)    | 1973 (15.82%) | 10396 (83.38%) |
| 74869   | Anopheles maculatus                                | 0 (0.0%)    | 0 (0.0%)      | 2913 (21.14%) | 10869 (78.86%) |
| 34690   | Anopheles melas                                    | 0 (0.0%)    | 365 (2.38%)   | 3313 (21.59%) | 11667 (76.03%) |
| 30066   | Anopheles merus                                    | 0 (0.0%)    | 13 (0.1%)     | 3260 (24.94%) | 9799 (74.96%)  |
| 112268  | Anopheles minimus                                  | 0 (0.0%)    | 0 (0.0%)      | 2135 (18.64%) | 9317 (81.36%)  |
| 34691   | Anopheles quadrimaculatus                          | 0 (0.0%)    | 20 (0.17%)    | 2386 (19.84%) | 9618 (79.99%)  |
| 74873   | Anopheles sinensis                                 | 513 (3.6)%  | 0 (0.0%)      | 3200 (22.46%) | 10537 (73.94%) |
| 30069   | Anopheles stephensi                                | 1 (0.01)%   | 5 (0.04%)     | 2161 (18.53%) | 9496 (81.42%)  |
| 7462    | Apis dorsata                                       | 0 (0.0%)    | 101 (0.52%)   | 2227 (11.44%) | 17131 (88.04%) |
| 7463    | Apis florea                                        | 0 (0.0%)    | 134 (1.19%)   | 1920 (17.06%) | 9199 (81.75%)  |
| 7460    | Apis mellifera                                     | 946 (7.25)% | 85 (0.65%)    | 2140 (16.41%) | 9873 (75.69%)  |
| 663331  | Arthroderma benhamiae cbs 112371                   | 67 (0.88)%  | 0 (0.0%)      | 716 (9.37%)   | 6856 (89.75%)  |
| 535722  | Arthroderma gypseum cbs 118893                     | 53 (0.64)%  | 0 (0.0%)      | 699 (8.45%)   | 7519 (90.91%)  |
| 554155  | Arthroderma otiae cbs 113480                       | 25 (0.3)%   | 0 (0.0%)      | 568 (6.93%)   | 7606 (92.77%)  |
| 344612  | Aspergillus clavatus nrrl 1                        | 35 (0.4)%   | 0 (0.0%)      | 642 (7.25%)   | 8182 (92.36%)  |
| 332952  | Aspergillus flavus nrrl3357                        | 64 (0.51)%  | 0 (0.0%)      | 1455 (11.63%) | 10987 (87.85%) |
| 451804  | Aspergillus fumigatus a1163                        | 10 (0.1)%   | 222 (2.27%)   | 793 (8.12%)   | 8747 (89.51%)  |
| 330879  | Aspergillus fumigatus af293                        | 3 (0.03)%   | 222 (2.32%)   | 754 (7.87%)   | 8604 (89.78%)  |
| 1033177 | Aspergillus kawachii ifo 4308                      | 13 (0.12)%  | 0 (0.0%)      | 1122 (10.0%)  | 10081 (89.88%) |
| 227321  | Aspergillus nidulans fgsc a4                       | 164 (1.66)% | 0 (0.0%)      | 631 (6.39%)   | 9081 (91.95%)  |
| 380704  | Aspergillus niger atcc 1015                        | 12 (0.11)%  | 108 (1.01%)   | 963 (8.98%)   | 9639 (89.9%)   |
| 425011  | Aspergillus niger cbs 513.88                       | 253 (2.15)% | 108 (0.92%)   | 1214 (10.33%) | 10176 (86.6%)  |
| 1160506 | Aspergillus oryzae 3.042                           | 0 (0.0%)    | 123 (1.08%)   | 1238 (10.9%)  | 9994 (88.01%)  |
| 510516  | Aspergillus oryzae rib40                           | 3 (0.03)%   | 123 (1.03%)   | 1357 (11.38%) | 10441 (87.56%) |
| 341663  | Aspergillus terreus nih2624                        | 31 (0.31)%  | 0 (0.0%)      | 754 (7.53%)   | 9227 (92.16%)  |
| 665024  | Bipolaris maydis atcc 48331                        | 10 (0.08)%  | 707 (5.64%)   | 1994 (15.92%) | 9818 (78.36%)  |
| 701091  | Bipolaris maydis c5                                | 7 (0.06)%   | 708 (5.57%)   | 1979 (15.58%) | 10011 (78.8%)  |
| 665912  | Bipolaris sorokiniana nd90pr                       | 66 (0.58)%  | 0 (0.0%)      | 1775 (15.5%)  | 9610 (83.92%)  |
| 132113  | Bombus impatiens                                   | 0 (0.0%)    | 0 (0.0%)      | 2672 (21.48%) | 9770 (78.52%)  |
| 30195   | Bombus terrestris                                  | 0 (0.0%)    | 0 (0.0%)      | 2606 (21.36%) | 9595 (78.64%)  |
| 1290391 | Botryotinia fucikeliana bcdw1                      | 13 (0.12)%  | 0 (0.0%)      | 1634 (15.14%) | 9145 (84.74%)  |
| 999810  | Botryotinia fucikeliana t4                         | 802 (6.48)% | 0 (0.0%)      | 1939 (15.68%) | 9627 (77.84%)  |
| 135651  | Caenorhabditis briggsi                             | 545 (2.1)%  | 192 (0.74%)   | 7935 (30.55%) | 17306 (66.62%) |
| 6238    | Caenorhabditis breyniae af16                       | 470 (2.47)% | 2220 (11.69%) | 4576 (24.1%)  | 11724 (61.74%) |
| 6239    | Caenorhabditis elegans                             | 229 (1.24)% | 15 (0.08%)    | 6639 (36.01%) | 11551 (62.66%) |
| 281687  | Caenorhabditis japonica                            | 362 (1.57)% | 17 (0.07%)    | 6127 (26.57%) | 16551 (71.78%) |
| 31234   | Caenorhabditis remanei                             | 214 (0.79)% | 225 (0.83%)   | 8283 (30.59%) | 18356 (67.79%) |
| 237561  | Candida albicans sc5314                            | 250 (3.2)%  | 113 (1.44%)   | 914 (11.68%)  | 6546 (83.68%)  |
| 294748  | Candida albicans wo-1                              | 0 (0.0%)    | 105 (1.85%)   | 532 (9.35%)   | 5052 (88.8%)   |
| 573826  | Candida dubliniensis cd36                          | 2 (0.03)%   | 0 (0.0%)      | 539 (9.31%)   | 5246 (90.65%)  |
| 284593  | Candida glabrata cbs 138                           | 12 (0.24)%  | 0 (0.0%)      | 217 (4.29%)   | 4826 (95.47%)  |
| 1245528 | Candida maltosa xu316                              | 83 (1.45)%  | 0 (0.0%)      | 453 (7.94%)   | 5172 (90.61%)  |
| 1136231 | Candida orthopsilosis co 90-125                    | 4 (0.07)%   | 0 (0.0%)      | 494 (8.82%)   | 5105 (91.11%)  |
| 578454  | Candida parapsilosis cdc317                        | 2 (0.03)%   | 0 (0.0%)      | 504 (8.81%)   | 5213 (91.15%)  |
| 590646  | Candida tenuis atcc 10573                          | 19 (0.33)%  | 0 (0.0%)      | 372 (6.4%)    | 5425 (93.28%)  |
| 294747  | Candida tropicalis mya-3404                        | 22 (0.37)%  | 0 (0.0%)      | 563 (9.39%)   | 5411 (90.24%)  |
| 306901  | Chaetomium globosum cbs 148.51                     | 125 (1.25)% | 0 (0.0%)      | 978 (9.78%)   | 8892 (88.96%)  |
| 759272  | Chaetomium thermophilum var. thermophilum dsm 1495 | 49 (0.71)%  | 0 (0.0%)      | 437 (6.29%)   | 6462 (93.01%)  |
| 7719    | Ciona intestinalis                                 | 759 (5.82)% | 0 (0.0%)      | 1901 (14.57%) | 10384 (79.61%) |
| 51511   | Ciona savignyi                                     | 182 (1.76)% | 0 (0.0%)      | 1484 (14.37%) | 8661 (83.87%)  |
| 246410  | Coccidioides immitis rs                            | 56 (0.64)%  | 0 (0.0%)      | 1132 (12.97%) | 7539 (86.39%)  |
| 222929  | Coccidioides posadasii c735 delta sowgp            | 5 (0.07)%   | 11 (0.15%)    | 382 (5.31%)   | 6793 (94.47%)  |
| 443226  | Coccidioides posadasii str. silveira               | 93 (1.06)%  | 11 (0.13%)    | 1122 (12.84%) | 7511 (85.97%)  |
| 1237896 | Colletotrichum gloeosporioides cg-14               | 982 (6.38)% | 184 (1.2%)    | 1894 (12.31%) | 12324 (80.11%) |
| 1213859 | Colletotrichum gloeosporioides nara gc5            | 26 (0.17)%  | 185 (1.24%)   | 1856 (12.43%) | 12865 (86.16%) |
| 645133  | Colletotrichum graminicola m1.001                  | 73 (0.65)%  | 0 (0.0%)      | 1246 (11.12%) | 9891 (88.23%)  |
| 759273  | Colletotrichum higginsianum imi 349063             | 195 (1.41)% | 0 (0.0%)      | 1579 (11.41%) | 12069 (87.18%) |
| 1213857 | Colletotrichum orbiculare maff 240422              | 103 (0.84)% | 0 (0.0%)      | 1482 (12.14%) | 10620 (87.01%) |
| 367775  | Cryptococcus gattii wm276                          | 28 (0.44)%  | 0 (0.0%)      | 767 (12.15%)  | 5519 (87.41%)  |
| 235443  | Cryptococcus neoformans var. grubii h99            | 14 (0.2)%   | 0 (0.0%)      | 902 (12.66%)  | 6211 (87.15%)  |
| 283643  | Cryptococcus neoformans var. neoformans b-3501a    | 0 (0.0%)    | 17 (0.26%)    | 778 (11.89%)  | 5747 (87.85%)  |
| 214684  | Cryptococcus neoformans var. neoformans jec21      | 2 (0.03)%   | 17 (0.27%)    | 685 (10.8%)   | 5638 (88.9%)   |
| 7217    | Drosophila ananassae                               | 49 (0.35)%  | 0 (0.0%)      | 2871 (20.54%) | 11056 (79.11%) |
| 7220    | Drosophila erecta                                  | 23 (0.16)%  | 35 (0.25%)    | 3237 (22.92%) | 10828 (76.67%) |
| 7222    | Drosophila grimshawi                               | 102 (0.72)% | 0 (0.0%)      | 2780 (19.6%)  | 11302 (79.68%) |
| 7227    | Drosophila melanogaster                            | 461 (3.29)% | 19 (0.14%)    | 3008 (21.46%) | 10528 (75.11%) |
| 7230    | Drosophila mojavensis                              | 68 (0.5)%   | 0 (0.0%)      | 2668 (19.81%) | 10735 (79.69%) |
| 7234    | Drosophila persimilis                              | 124 (0.8)%  | 0 (0.0%)      | 3600 (23.3%)  | 11728 (75.9%)  |
| 7237    | Drosophila pseudoobscura                           | 6 (0.04)%   | 0 (0.0%)      | 3366 (22.46%) | 11617 (77.5%)  |
| 7238    | Drosophila sechellia                               | 61 (0.4)%   | 673 (4.43%)   | 3026 (19.91%) | 11437 (75.26%) |
| 7240    | Drosophila simulans                                | 74 (0.52)%  | 35 (0.25%)    | 3523 (24.68%) | 10644 (74.56%) |

Continued on next page

Table S1 – Continued from previous page

| Tax ID  | Tax Name                                         | Orphans     | Genus Orphans | Intermediate  | Ancient        |
|---------|--------------------------------------------------|-------------|---------------|---------------|----------------|
| 7244    | <i>Drosophila virilis</i>                        | 46 (0.34)%  | 0 (0.0%)      | 2722 (20.02%) | 10829 (79.64%) |
| 7260    | <i>Drosophila willistoni</i>                     | 29 (0.2)%   | 0 (0.0%)      | 2589 (18.07%) | 11707 (81.72%) |
| 7245    | <i>Drosophila yakuba</i>                         | 32 (0.22)%  | 10 (0.07%)    | 3422 (23.09%) | 11357 (76.63%) |
| 284813  | Encephalitozoon cuniculi gb-m1                   | 5 (0.26)%   | 0 (0.0%)      | 379 (19.72%)  | 1538 (80.02%)  |
| 907965  | Encephalitozoon hellem atcc 50504                | 0 (0.0)%    | 0 (0.0%)      | 367 (20.23%)  | 1447 (79.77%)  |
| 876142  | Encephalitozoon intestinalis atcc 50506          | 3 (0.17)%   | 0 (0.0%)      | 367 (20.19%)  | 1448 (79.65%)  |
| 1178016 | Encephalitozoon romaleae sj-2008                 | 0 (0.0)%    | 0 (0.0%)      | 370 (20.37%)  | 1446 (79.63%)  |
| 1279085 | Fusarium fujikuroi imi 58289                     | 27 (0.19)%  | 0 (0.0%)      | 1972 (13.8%)  | 12295 (86.02%) |
| 229533  | Fusarium graminearum ph-1                        | 133 (1.08)% | 0 (0.0%)      | 1688 (13.76%) | 10448 (85.16%) |
| 1229664 | Fusarium oxysporum f. sp. cubense race 1         | 5 (0.03)%   | 96 (0.64%)    | 2308 (15.29%) | 12681 (84.04%) |
| 1229665 | Fusarium oxysporum f. sp. cubense race 4         | 4 (0.03)%   | 96 (0.69%)    | 2115 (15.21%) | 11693 (84.07%) |
| 426428  | Fusarium oxysporum f. sp. lycopersici 4287       | 393 (2.43)% | 0 (0.0%)      | 2308 (14.28%) | 13459 (83.29%) |
| 660025  | Fusarium oxysporum fo5176                        | 240 (1.42)% | 44 (0.26%)    | 2234 (13.24%) | 14353 (85.07%) |
| 1028729 | Fusarium pseudograminearum cs3096                | 112 (0.93)% | 0 (0.0%)      | 1555 (12.94%) | 10347 (86.12%) |
| 1104152 | Glarea lozoyensis 74030                          | 243 (3.45)% | 0 (0.0%)      | 731 (10.39%)  | 6063 (86.16%)  |
| 1116229 | Glarea lozoyensis atcc 20868                     | 110 (0.92)% | 0 (0.0%)      | 1339 (11.18%) | 10525 (87.9%)  |
| 1071382 | Kazachstania africana cbs 2517                   | 7 (0.13)%   | 0 (0.0%)      | 249 (4.73%)   | 5004 (95.13%)  |
| 1071383 | Kazachstania naganishii cbs 8797                 | 9 (0.17)%   | 0 (0.0%)      | 227 (4.37%)   | 4960 (95.46%)  |
| 981350  | Komagataella pastoris cbs 7435                   | 5 (0.1)%    | 0 (0.0%)      | 277 (5.61%)   | 4656 (94.29%)  |
| 644223  | Komagataella pastoris gs115                      | 1 (0.02)%   | 0 (0.0%)      | 271 (5.43%)   | 4722 (94.55%)  |
| 242507  | Magnaporthe oryzae 70-15                         | 56 (0.47)%  | 89 (0.75%)    | 2479 (20.87%) | 9257 (77.91%)  |
| 1143193 | Magnaporthe oryzae p131                          | 61 (0.5)%   | 675 (5.51%)   | 2450 (20.0%)  | 9062 (73.99%)  |
| 1143189 | Magnaporthe oryzae y34                           | 74 (0.6)%   | 88 (0.71%)    | 3068 (24.83%) | 9126 (73.86%)  |
| 644358  | Magnaporthe poae atcc 64411                      | 189 (1.95)% | 0 (0.0%)      | 1247 (12.88%) | 8246 (85.17%)  |
| 425265  | Malassezia globosa cbs 7966                      | 18 (0.43)%  | 0 (0.0%)      | 215 (5.16%)   | 3935 (94.41%)  |
| 1230383 | Malassezia sympodialis atcc 42132                | 0 (0.0)%    | 0 (0.0%)      | 141 (4.2%)    | 3217 (95.8%)   |
| 655827  | Metarhizium acridum cqma 102                     | 4 (0.04)%   | 0 (0.0%)      | 829 (8.67%)   | 8729 (91.29%)  |
| 655844  | Metarhizium anisopliae arsef 23                  | 28 (0.27)%  | 0 (0.0%)      | 922 (8.88%)   | 9429 (90.85%)  |
| 554373  | Moniliophthora perniciosa fa553                  | 63 (0.55)%  | 0 (0.0%)      | 1200 (10.57%) | 10091 (88.88%) |
| 1381753 | Moniliophthora roreri mca 2997                   | 82 (0.51)%  | 0 (0.0%)      | 1613 (10.57%) | 14346 (89.43%) |
| 1064592 | Naumovozyma castellii cbs 4309                   | 10 (0.18)%  | 0 (0.0%)      | 275 (5.02%)   | 5191 (94.8%)   |
| 1071378 | Naumovozyma dairienensis cbs 421                 | 11 (0.2)%   | 0 (0.0%)      | 248 (4.55%)   | 5186 (95.24%)  |
| 881290  | Nematocida parisii ertm1                         | 2 (0.08)%   | 146 (5.64%)   | 645 (24.92%)  | 1795 (69.36%)  |
| 935791  | Nematocida parisii ertm3                         | 11 (0.42)%  | 147 (5.56%)   | 655 (24.77%)  | 1831 (69.25%)  |
| 944018  | Nematocida sp. 1 ertm2                           | 21 (0.84)%  | 0 (0.0%)      | 657 (26.21%)  | 1829 (72.96%)  |
| 367110  | Neurospora crassa or74a                          | 20 (0.2)%   | 0 (0.0%)      | 1659 (16.86%) | 8162 (82.94%)  |
| 510951  | Neurospora tetrasperma fgsc 2508                 | 14 (0.14)%  | 766 (7.57%)   | 1696 (16.76%) | 7644 (75.53%)  |
| 510952  | Neurospora tetrasperma fgsc 2509                 | 56 (0.54)%  | 766 (7.37%)   | 1774 (17.06%) | 7801 (75.03%)  |
| 578461  | Nosema bombycis cql                              | 75 (2.03)%  | 0 (0.0%)      | 404 (10.95%)  | 3210 (87.02%)  |
| 578460  | Nosema ceranae br101                             | 10 (0.53)%  | 0 (0.0%)      | 213 (11.21%)  | 1677 (88.26%)  |
| 482561  | Paracoccidioides brasiliensis pb03               | 11 (0.15)%  | 193 (2.56%)   | 663 (8.8%)    | 6669 (88.5%)   |
| 502780  | Paracoccidioides brasiliensis pb18               | 11 (0.14)%  | 193 (2.44%)   | 760 (9.63%)   | 6932 (87.79%)  |
| 502779  | Paracoccidioides sp. 'lutzii' pb01               | 51 (0.65)%  | 0 (0.0%)      | 817 (10.47%)  | 6936 (88.88%)  |
| 500485  | Penicillium chrysogenum wisconsin 54-1255        | 63 (0.55)%  | 0 (0.0%)      | 1122 (9.81%)  | 10252 (89.64%) |
| 1170230 | Penicillium digitatum pd1                        | 2 (0.02)%   | 411 (4.64%)   | 785 (8.86%)   | 7663 (86.48%)  |
| 1170229 | Penicillium digitatum phi26                      | 2 (0.02)%   | 411 (4.57%)   | 788 (8.75%)   | 7800 (86.66%)  |
| 1209962 | Pneumocystis jirovecii se8                       | 14 (0.44)%  | 0 (0.0%)      | 82 (2.58%)    | 3080 (96.98%)  |
| 1069680 | Pneumocystis murina b123                         | 6 (0.16)%   | 0 (0.0%)      | 83 (2.26%)    | 3583 (97.58%)  |
| 1151754 | Pseudozyma antarctica t-34                       | 38 (0.6)%   | 0 (0.0%)      | 874 (13.7%)   | 5466 (85.7%)   |
| 1305764 | Pseudozyma hubeiensis sy62                       | 74 (1.16)%  | 0 (0.0%)      | 905 (14.19%)  | 5400 (84.65%)  |
| 418459  | Puccinia graminis f. sp. tritici cri 75-36-700-3 | 202 (1.57)% | 0 (0.0%)      | 1067 (8.31%)  | 11565 (90.11%) |
| 630390  | Puccinia tritici-na 1-1 bbbd race 1              | 161 (1.54)% | 0 (0.0%)      | 794 (7.57%)   | 9533 (90.89%)  |
| 861557  | Pyrenophora teres f. teres 0-1                   | 54 (0.49)%  | 0 (0.0%)      | 1586 (14.38%) | 9386 (85.13%)  |
| 426418  | Pyrenophora tritici-repentis pt-1c-bfp           | 85 (0.77)%  | 0 (0.0%)      | 1614 (14.63%) | 9332 (84.6%)   |
| 983506  | Rhizoctonia solani ag-1 ia                       | 265 (3.4)%  | 0 (0.0%)      | 684 (8.77%)   | 6849 (87.83%)  |
| 1108050 | Rhizoctonia solani ag-1 ib                       | 166 (1.48)% | 0 (0.0%)      | 829 (7.41%)   | 10189 (91.1%)  |
| 1160507 | Saccharomyces arboricola h-6                     | 0 (0.0)%    | 0 (0.0%)      | 173 (4.76%)   | 3464 (95.24%)  |
| 545124  | Saccharomyces cerevisiae awri1631                | 132 (2.57)% | 0 (0.0%)      | 326 (6.35%)   | 4676 (91.08%)  |
| 764097  | Saccharomyces cerevisiae awri796                 | 1 (0.03)%   | 5 (0.13%)     | 243 (6.5%)    | 3491 (93.34%)  |
| 889517  | Saccharomyces cerevisiae cen.pk113-7d            | 0 (0.0)%    | 2 (0.04%)     | 309 (5.72%)   | 5091 (94.24%)  |
| 643680  | Saccharomyces cerevisiae ec1118                  | 0 (0.0)%    | 0 (0.0%)      | 823 (14.08%)  | 5022 (85.92%)  |
| 764102  | Saccharomyces cerevisiae fostersb                | 3 (0.08)%   | 0 (0.0%)      | 229 (6.25%)   | 3433 (93.67%)  |
| 764101  | Saccharomyces cerevisiae fosterso                | 4 (0.11)%   | 0 (0.0%)      | 227 (6.46%)   | 3285 (93.43%)  |
| 574961  | Saccharomyces cerevisiae jay291                  | 1 (0.02)%   | 0 (0.0%)      | 361 (6.99%)   | 4801 (92.99%)  |
| 721032  | Saccharomyces cerevisiae kyokai no. 7            | 1 (0.02)%   | 1 (0.02%)     | 409 (7.2%)    | 5273 (92.77%)  |
| 764098  | Saccharomyces cerevisiae lalvin qa23             | 1 (0.03)%   | 4 (0.1%)      | 244 (6.14%)   | 3725 (93.73%)  |
| 285006  | Saccharomyces cerevisiae rm11-1a                 | 3 (0.06)%   | 0 (0.0%)      | 384 (7.23%)   | 4926 (92.72%)  |
| 559292  | Saccharomyces cerevisiae s288c                   | 16 (0.25)%  | 5 (0.08%)     | 909 (14.06%)  | 5536 (85.62%)  |
| 764099  | Saccharomyces cerevisiae vin13                   | 1 (0.03)%   | 1 (0.03%)     | 247 (6.35%)   | 3640 (93.6%)   |
| 764100  | Saccharomyces cerevisiae vl3                     | 0 (0.0)%    | 5 (0.13%)     | 266 (6.67%)   | 3719 (93.21%)  |
| 307796  | Saccharomyces cerevisiae yjm789                  | 0 (0.0)%    | 2 (0.03%)     | 411 (7.08%)   | 5391 (92.88%)  |
| 226230  | Saccharomyces kudriavzevii ifo 1802              | 0 (0.0)%    | 0 (0.0%)      | 231 (6.22%)   | 3480 (93.78%)  |
| 653667  | Schizosaccharomyces cryophilus oy26              | 13 (0.26)%  | 0 (0.0%)      | 423 (8.48%)   | 4554 (91.26%)  |
| 402676  | Schizosaccharomyces japonicus yfs275             | 16 (0.34)%  | 0 (0.0%)      | 315 (6.73%)   | 4350 (92.93%)  |
| 483514  | Schizosaccharomyces octosporus yfs286            | 5 (0.1)%    | 0 (0.0%)      | 400 (8.18%)   | 4484 (91.72%)  |
| 284812  | Schizosaccharomyces pombe 972h-                  | 18 (0.36)%  | 0 (0.0%)      | 389 (7.88%)   | 4530 (91.76%)  |
| 936435  | Serpula lacrymans var. lacrymans s7.3            | 88 (0.67)%  | 0 (0.0%)      | 2295 (17.56%) | 10684 (81.76%) |
| 578457  | Serpula lacrymans var. lacrymans s7.9            | 73 (0.62)%  | 0 (0.0%)      | 2201 (18.65%) | 9528 (80.73%)  |
| 441960  | Talaromyces marneffei atcc 18224                 | 11 (0.11)%  | 0 (0.0%)      | 648 (6.39%)   | 9484 (93.5%)   |
| 441959  | Talaromyces stipitatus atcc 10500                | 11 (0.09)%  | 0 (0.0%)      | 813 (6.57%)   | 11545 (93.34%) |
| 1071380 | Tetraplisispora blattae cbs 6284                 | 17 (0.32)%  | 0 (0.0%)      | 236 (4.47%)   | 5027 (95.21%)  |
| 1071381 | Tetraplisispora phaffii cbs 4417                 | 11 (0.21)%  | 0 (0.0%)      | 251 (4.88%)   | 4877 (94.9%)   |
| 452589  | Trichoderma atroviride imi 206040                | 96 (0.89)%  | 0 (0.0%)      | 1056 (9.77%)  | 9661 (89.35%)  |
| 431241  | Trichoderma reesei qm6a                          | 36 (0.41)%  | 0 (0.0%)      | 774 (8.79%)   | 8000 (90.81%)  |
| 413071  | Trichoderma virens gv29-8                        | 40 (0.34)%  | 0 (0.0%)      | 1233 (10.57%) | 10387 (89.08%) |
| 559882  | Trichophyton equinum cbs 127.97                  | 24 (0.29)%  | 0 (0.0%)      | 1025 (12.37%) | 7240 (87.34%)  |
| 559305  | Trichophyton rubrum cbs 118892                   | 40 (0.5)%   | 0 (0.0%)      | 755 (9.41%)   | 7227 (90.09%)  |
| 647933  | Trichophyton tonsurans cbs 112818                | 14 (0.17)%  | 0 (0.0%)      | 995 (12.07%)  | 7235 (87.76%)  |
| 663202  | Trichophyton verrucosum hki 0517                 | 63 (0.82)%  | 0 (0.0%)      | 730 (9.53%)   | 6869 (89.65%)  |
| 1186058 | Trichosporon asahii var. asahii cbs 2479         | 23 (0.28)%  | 0 (0.0%)      | 1059 (13.09%) | 7009 (86.63%)  |

Continued on next page

Table S1 – Continued from previous page

| <b>Tax ID</b> | <b>Tax Name</b>                          | <b>Orphans</b> | <b>Genus Orphans</b> | <b>Intermediate</b> | <b>Ancient</b> |
|---------------|------------------------------------------|----------------|----------------------|---------------------|----------------|
| 1220162       | Trichosporon asahii var. asahii cbs 8904 | 33 (0.4)%      | 0 (0.0%)             | 1062 (12.88%)       | 7150 (86.72%)  |
| 1128400       | Ustilago hordei uh4857-4                 | 28 (0.41)%     | 0 (0.0%)             | 854 (12.6%)         | 5897 (86.99%)  |
| 237631        | Ustilago maydis 521                      | 15 (0.24)%     | 0 (0.0%)             | 824 (13.28%)        | 5364 (86.47%)  |
| 526221        | Verticillium alfalfae vams.102           | 51 (0.52)%     | 0 (0.0%)             | 968 (9.92%)         | 8737 (89.56%)  |
| 498257        | Verticillium dahliae vds.17              | 53 (0.53)%     | 0 (0.0%)             | 998 (9.94%)         | 8990 (89.53%)  |
| 1299270       | Wallemia ichthyophaga exf-994            | 14 (0.3)%      | 0 (0.0%)             | 247 (5.28%)         | 4419 (94.42%)  |
| 671144        | Wallemia sebi cbs 633.66                 | 7 (0.14)%      | 0 (0.0%)             | 263 (5.2%)          | 4784 (94.66%)  |
