# Supplementary material for: High GC content causes orphan proteins to be intrinsically disordered
Source: PubMed Central journal article supplement (PMC5389847; doi:10.1371/journal.pcbi.1005375), 2017-03-29
Supplement: pcbi.1005375.s002.pdf [file pcbi.1005375.s002.pdf]

| AA  | GC%  | TOP-IDP | Hessa | Alpha | Beta  | Coil  | Turn  |
|-----|------|---------|-------|-------|-------|-------|-------|
| Ala | 0.83 | 0.06    | 0.11  | 0.17  | -0.15 | -0.08 | -0.10 |
| Arg | 0.72 | 0.18    | 2.58  | 0.09  | -0.04 | -0.05 | -0.04 |
| Asn | 0.17 | 0.01    | 2.05  | -0.11 | -0.22 | 0.07  | 0.20  |
| Asp | 0.50 | 0.19    | 3.49  | -0.03 | -0.27 | 0.08  | 0.08  |
| Cys | 0.50 | 0.02    | -0.13 | -0.02 | 0.08  | -0.02 | -0.02 |
| Gln | 0.50 | 0.32    | 2.36  | 0.07  | -0.08 | -0.02 | 0.00  |
| Glu | 0.50 | 0.74    | 2.68  | 0.18  | -0.25 | -0.12 | 0.06  |
| Gly | 0.83 | 0.17    | 0.74  | -0.29 | -0.18 | 0.10  | 0.27  |
| His | 0.50 | 0.30    | 2.06  | 0.00  | -0.06 | 0.03  | -0.01 |
| Ile | 0.11 | -0.49   | -0.60 | 0.00  | 0.26  | -0.05 | -0.62 |
| Leu | 0.39 | -0.33   | -0.55 | 0.09  | 0.10  | -0.09 | -0.17 |
| Lys | 0.17 | 0.59    | 2.71  | 0.07  | -0.14 | -0.05 | 0.11  |
| Met | 0.33 | -0.40   | -0.10 | 0.13  | 0.08  | -0.09 | -0.36 |
| Phe | 0.17 | -0.70   | -0.32 | 0.08  | 0.14  | -0.10 | -0.20 |
| Pro | 0.83 | 0.99    | 2.23  | -0.31 | -0.45 | 0.19  | 0.15  |
| Ser | 0.50 | 0.34    | 0.84  | -0.13 | -0.03 | 0.05  | 0.12  |
| Thr | 0.50 | 0.06    | 0.52  | -0.11 | 0.09  | 0.06  | -0.13 |
| Trp | 0.67 | -0.88   | 0.30  | 0.04  | 0.12  | -0.03 | -0.26 |
| Tyr | 0.17 | -0.51   | 0.68  | -0.10 | 0.10  | 0.04  | -0.10 |
| Val | 0.50 | -0.12   | -0.31 | 0.00  | 0.29  | -0.11 | -0.41 |

Table S2: For each amino acid we show the GC content of its codons, its value in the TOP-IDP scale, its hydrophobicity (Hessa scale), as well as its value in the secondary structure scales for Alpha, Beta, Coil and Turn propensity.
